# Supplementary material for: Bone marrow mesenchymal stem cell aggregate: an optimal cell therapy for full-layer cutaneous wound vascularization and regeneration
Source: PubMed Central journal article supplement (PMC4655471; doi:10.1038/srep17036), 2015-11-23
Supplement: srep17036-s1.pdf [file srep17036-s1.pdf]

## **Bone marrow mesenchymal stem cell aggregate: an optimal cell therapy for full-layer cutaneous wound vascularization and regeneration**

Yulin An<sup>a,b,c,1</sup>, Wei wei<sup>a,b,d,1</sup>, Huan Jing<sup>a,b,1</sup>, Leiguo Ming<sup>a,b</sup>, Shiyu Liu<sup>a,b</sup>, Yan Jin<sup>a,b,\*</sup>

<sup>a</sup> *State Key Laboratory of Military Stomatology, Center of Tissue Engineering, School of Stomatology, The Fourth Military Medical University, No.145 Changlexi Road, Xi'an, Shaanxi 710032, China.*

<sup>b</sup> *Research and Development Center for Tissue Engineering, Fourth Military Medical University, No.145 Changlexi Road, Xi'an, Shaanxi 710032, China.*

<sup>c</sup> *Zhen Jiang Entry-Exit Inspection And Quarantine Bureau, No. 84 Dongwu Road, Zhen Jiang, Jiang Su 212000, China.*

<sup>d</sup> *State Key Laboratory of Military Stomatology, Department of Periodontology, School of Stomatology, The Fourth Military Medical University, No.145 Changlexi Road, Xi'an 710032, China.*

<sup>\*</sup> *Corresponding author. Department of Oral Histology and Pathology, School of Stomatology, Fourth Military Medical University, No.145 Changlexi Road, Xi'an 710032, Shaanxi, China. Tel.: +86 029 8477 6471; fax: +86 029 8321 8039*

*E-mail addresses: yanjinfnmu@vip.sina.com*

<sup>1</sup> *Shared first co-authorship as three authors contributed equally to this work.*

Supplementary figures:

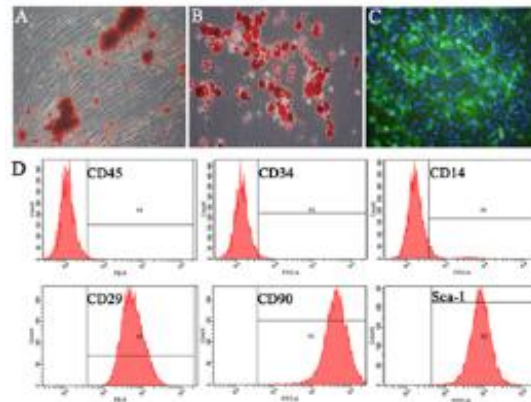

Supplementary Fig. 1

**Supplementary Fig. 1:** Isolation and identification of GFP<sup>+</sup>BMMSC.

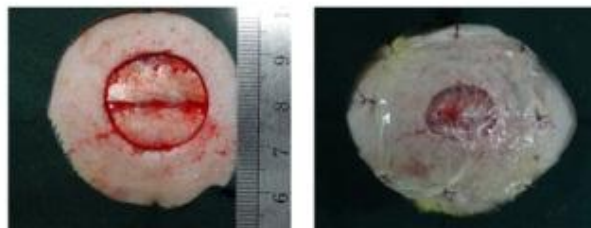

Supplementary Fig. 2

**Supplementary Fig. 2:** A 2cm diameter full thickness cutaneous wound was made on the top half of the rat back right across the midline of dorsum. A monolayer air permeating wound dressing (Tegaderm film1624, 3M, USA) was applied on SIS membrane after transplantation.

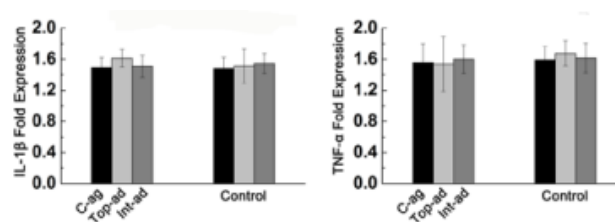

Supplementary Fig. 2

**Supplementary Fig. 3:** Expression of inflammatory cytokine IL-1 $\beta$  and TNF- $\alpha$  was similar among groups at 1-week post-operation.
